# Supplementary material for: Hijacking the expression of KDM4B-dependent metabolic genes potentiates curcumin antitumor effects
Source: Research Square preprint supplement (doi:10.21203/rs.3.rs-7328223/v1), 2025-09-09
Supplement: Supplementary file 1 [file f3ea71830d1d43c98d32edf0.pdf]

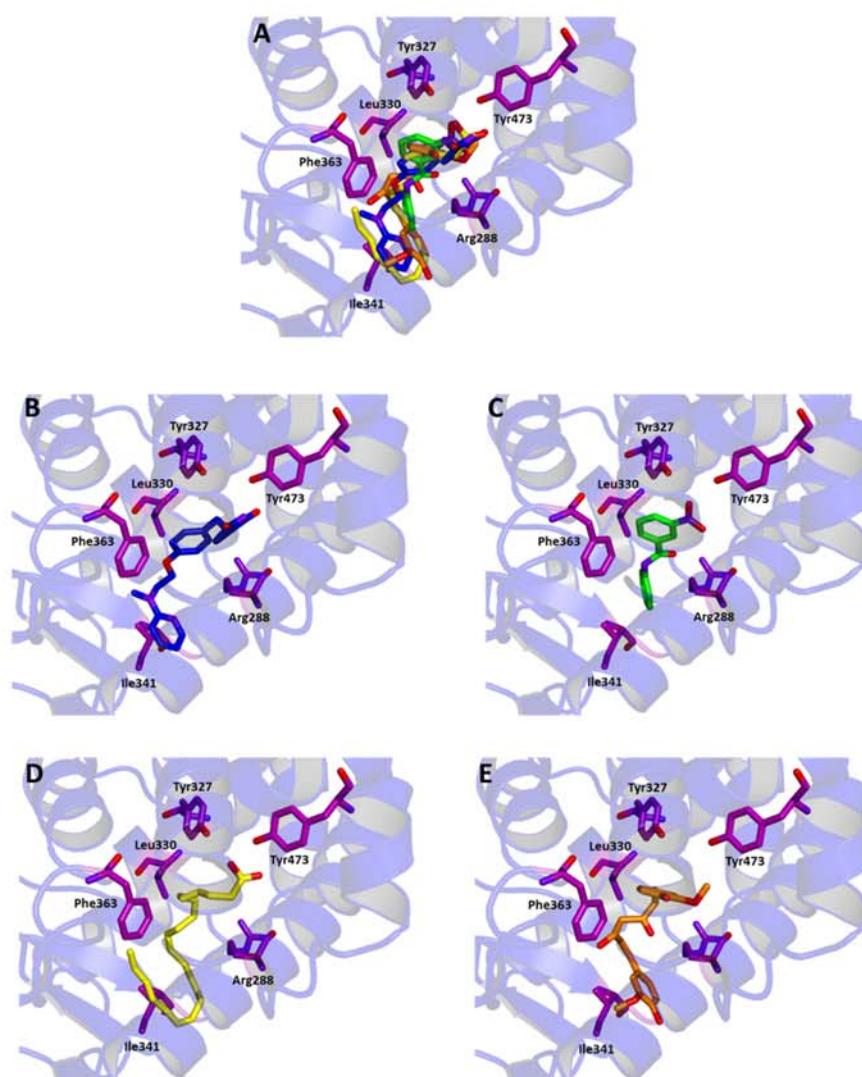

### Supplementary Figure 2. Curcumin docking to PPAR $\gamma$

Ligand-binding pocket of PPAR $\gamma$ . Protein structure is represented in ribbons. The key residues are also indicated. A) Superimposed binding modes of all the ligands: rosiglitazone (blue), GW9662 (green), DHA (yellow) and curcumin (orange); specific binding mode of (B) rosiglitazone; (C) GW9662; (D) DHA; (E) curcumin.
