# Supplementary material for: Hijacking the expression of KDM4B-dependent metabolic genes potentiates curcumin antitumor effects
Source: Research Square preprint supplement (doi:10.21203/rs.3.rs-7328223/v1), 2025-09-09
Supplement: Supplementary file 2 [file fdaf412a8ae3381eeb2c8673.pdf]

## H295R

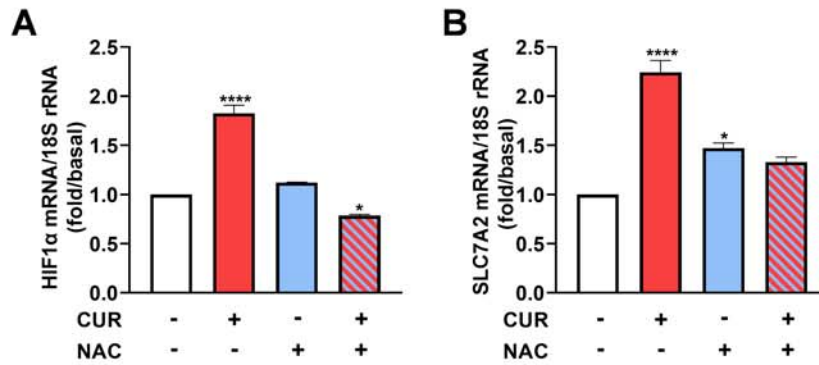

C

## H295R

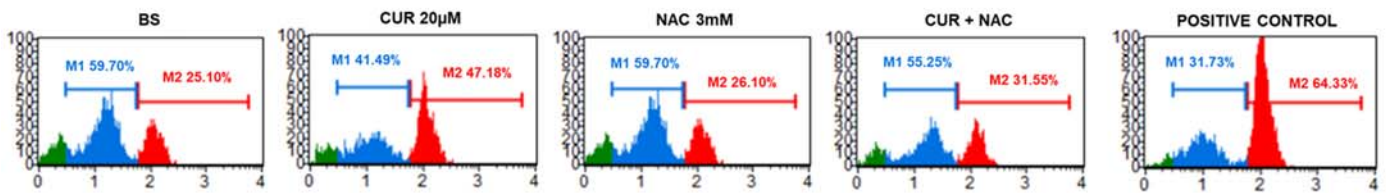

## H295R

## MUC-1

D

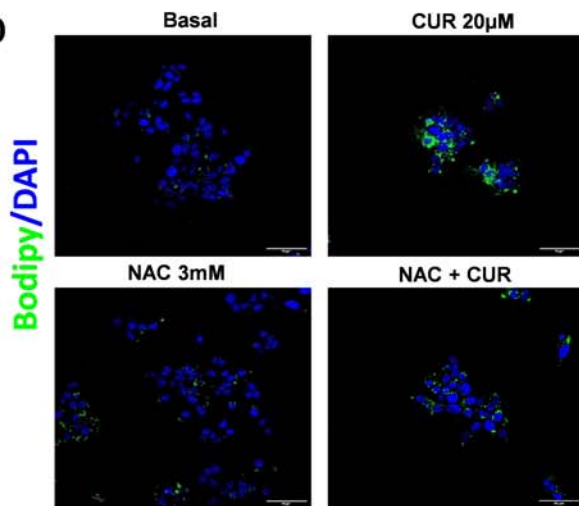

E

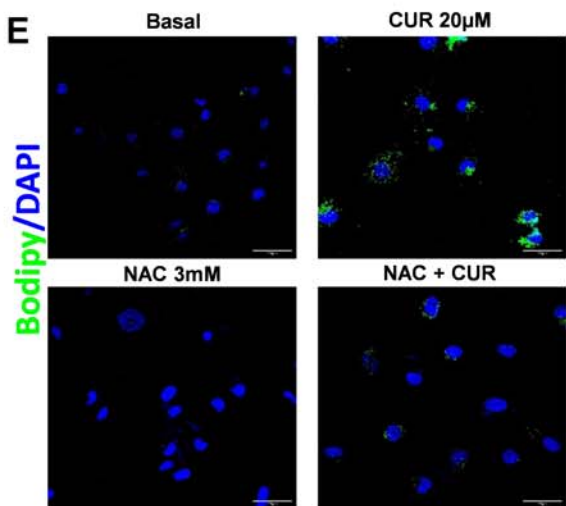

### Supplementary Figure 1. SLC27A2 upregulation is HIF1α/ROS dependent

Cells were treated for 48h with curcumin (20μM) and N-Acetyl-L-Cysteine (NAC) (3mM).

**A, B.** mRNA expression of HIF1α and SLC27A2 genes in H295R cells. Data were expressed as means ± SEM. \*p < 0.05; \*\*p < 0.01; \*\*\*p < 0.001 \*\*\*\*p < 0.0001.

**C.** H295R cells were labeled with oxidative stress reagent and analyzed by Muse Cell Analyser. In the cytograms, cells positive for reactive oxygen species (ROS) are shown in red. H<sub>2</sub>O<sub>2</sub> was used as a positive control.

**D, E.** Confocal images of neutral lipids in H295R (D) and MUC-1 (E) cells. Nuclei were stained by DAPI.
